# Supplementary material for: High-throughput functional evaluation of BRCA2 variants of unknown significance
Source: PubMed Central journal article supplement (PMC7244490; doi:10.1038/s41467-020-16141-8), 2020-05-22
Supplement: 41467_2020_16141_MOESM3_ESM.pdf [file 41467_2020_16141_MOESM3_ESM.pdf]

**Title:** Supplementary Data 1:

**Description:** Information of 107 initial variants and empty vector.

**Title:** Supplementary Data 2:

**Description:** Reclassifications of IARC Class 1/2/4/5 BRCA2 variants by ClinVar, ACMG, and MANO-B method.

**Title:** Supplementary Data 3:

**Description:** Information of 244 variants and the empty vector.

**Title:** Supplementary Data 4:

**Description:** Raw data of 7,344 relative viability values produced by MANO-B method.

**Title:** Supplementary Data 5:

**Description:** Functional classification by MANO-B methods with four drugs.

**Title:** Supplementary Software:

**Description:** Source codes and raw data for Bayesian inference.
